# Supplementary material
Source: PubMed Central journal article supplement (PMC2879154)
Supplement: NIHMS205041-supplement-supplementary.pdf [file NIHMS205041-supplement-supplementary.pdf]

## SUPPLEMENTARY INFORMATION

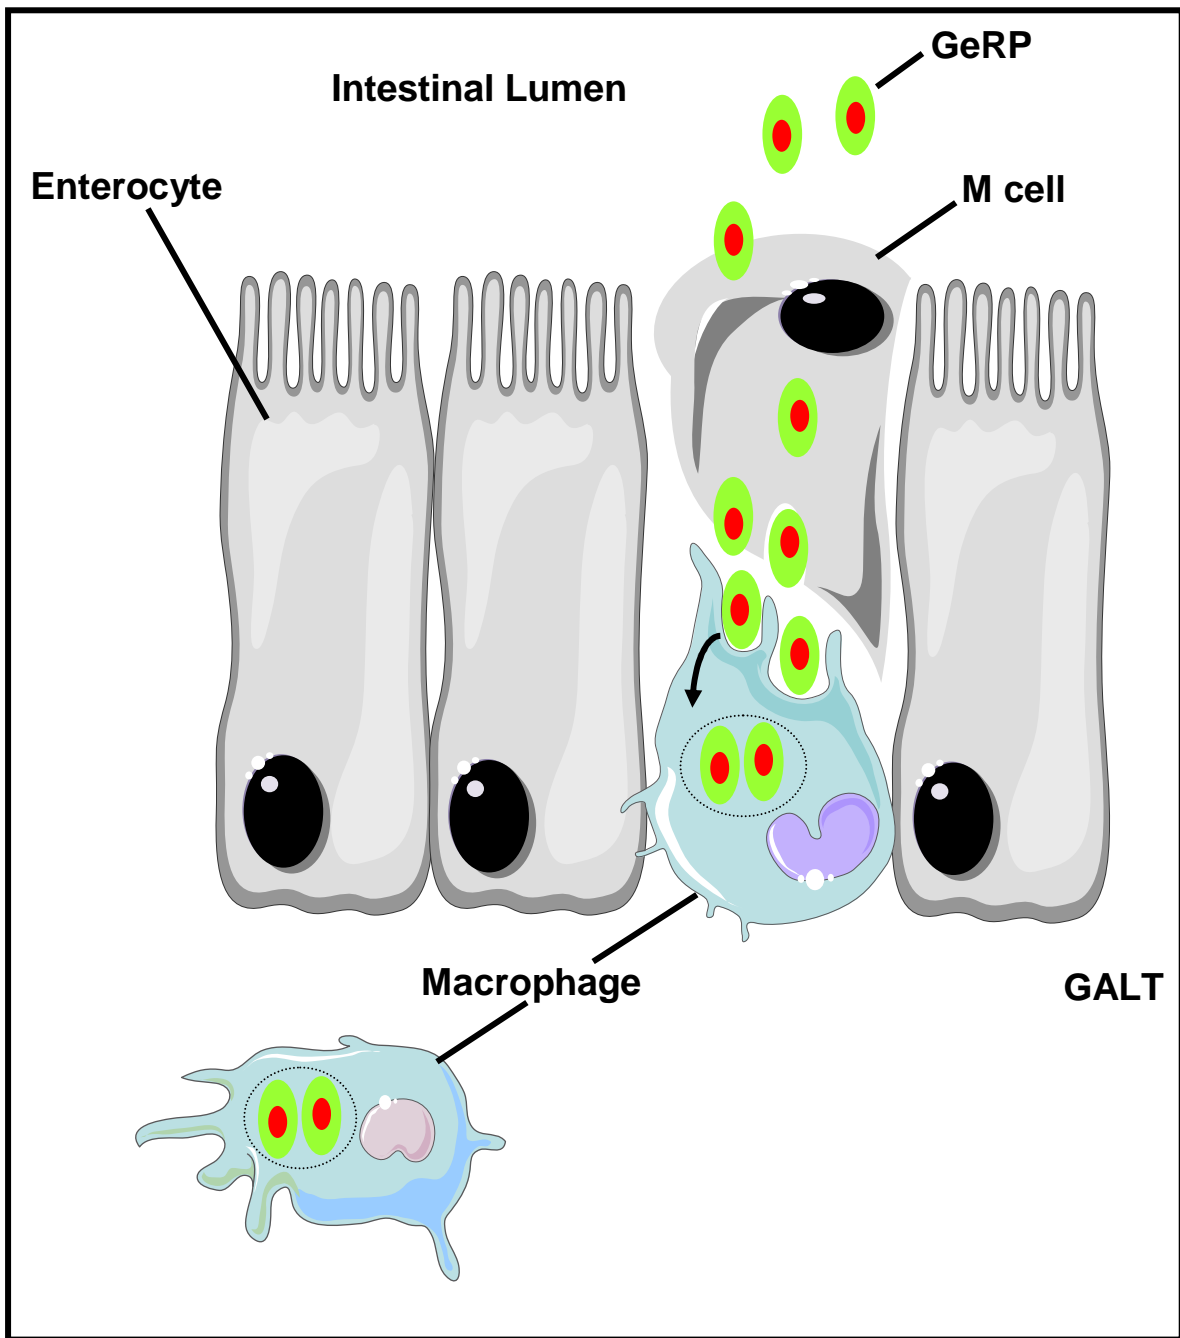

**Supplementary Figure 1. Model for GeRP uptake by macrophages in the gut associated lymphatic tissue (GALT).** GeRPs in the intestinal lumen enter M cells and gain access to GALT macrophages. Gastrointestinal macrophage phagocyte GeRP and transport them to various tissues such as spleen, liver and lung.

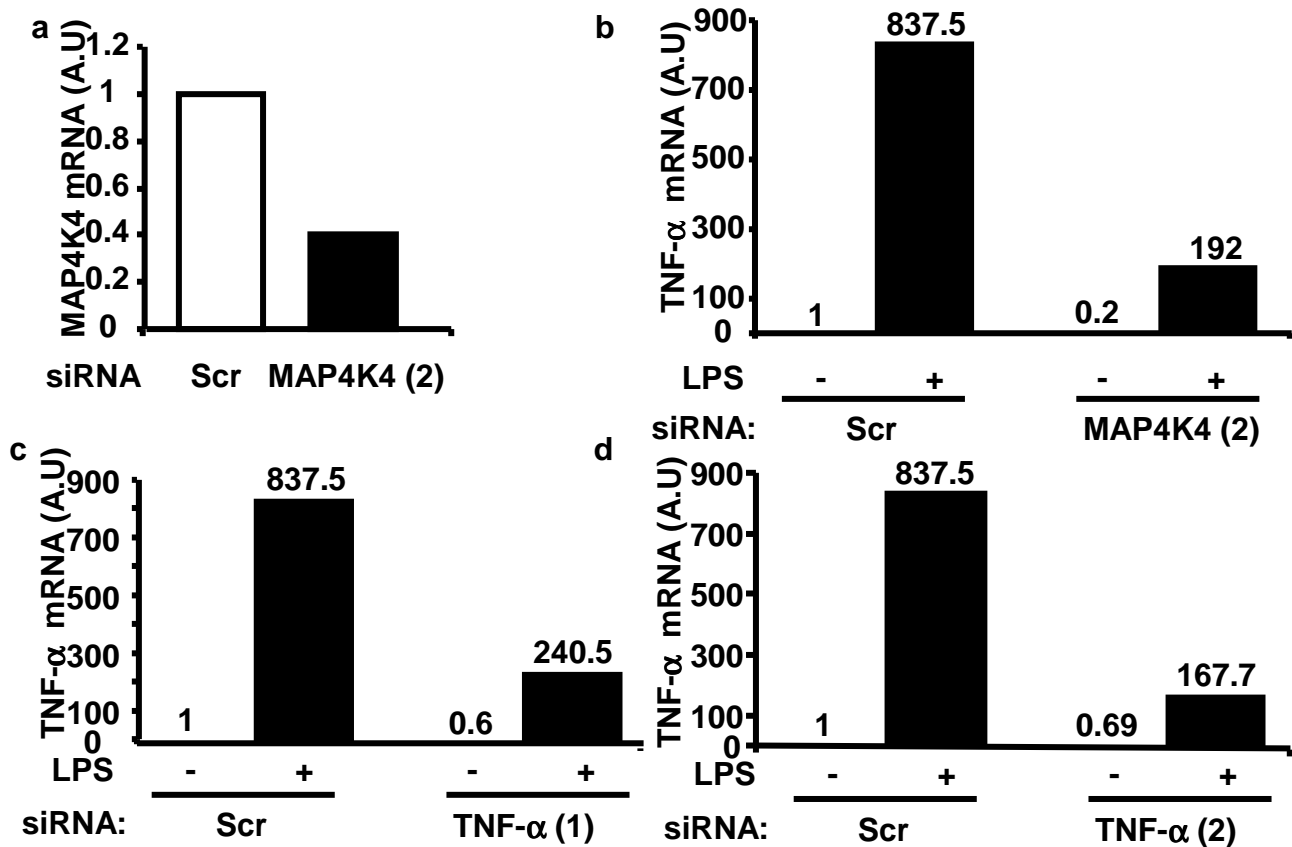

**Supplementary Figure 2. A second siRNA targeting MAP4K4 or two distinct TNF- $\alpha$  siRNA effectively silence MAP4K4 and TNF- $\alpha$  mRNA expression, respectively.** (a)  $10^6$  PECs were treated with  $10^7$  GeRPs loaded with 20 ug/kg of Scr or a second MAP4K4 siRNA: MAP4K4 (2). Total RNA was harvested 48 hours after treatment and analyzed by real time PCR for the expression of MAP4K4 mRNA. (b) LPS-induced TNF- $\alpha$  expression in PECs treated with Scr- or MAP4K4 (2) siRNA-GeRPs, (c) and (d) LPS-induced TNF- $\alpha$  expression in PECs treated with GeRPs loaded with 20 ug/kg of Scr, TNF- $\alpha$  (1) or TNF- $\alpha$  (2) siRNA.

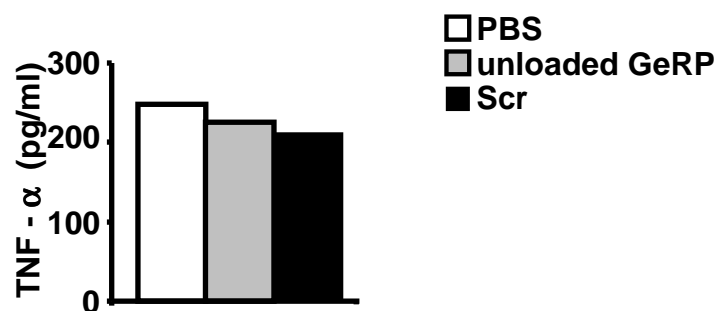

**Supplementary Figure 3. GeRPs loaded with scramble siRNA or unloaded GeRPs have no effect on LPS-induced TNF- $\alpha$  secretion.** (a)  $10^6$  PECs were treated with PBS,  $10^7$  unloaded GeRPs or GeRPs loaded with 20ug/kg of Scr. TNF- $\alpha$  levels in PEC media was measured by ELISA.

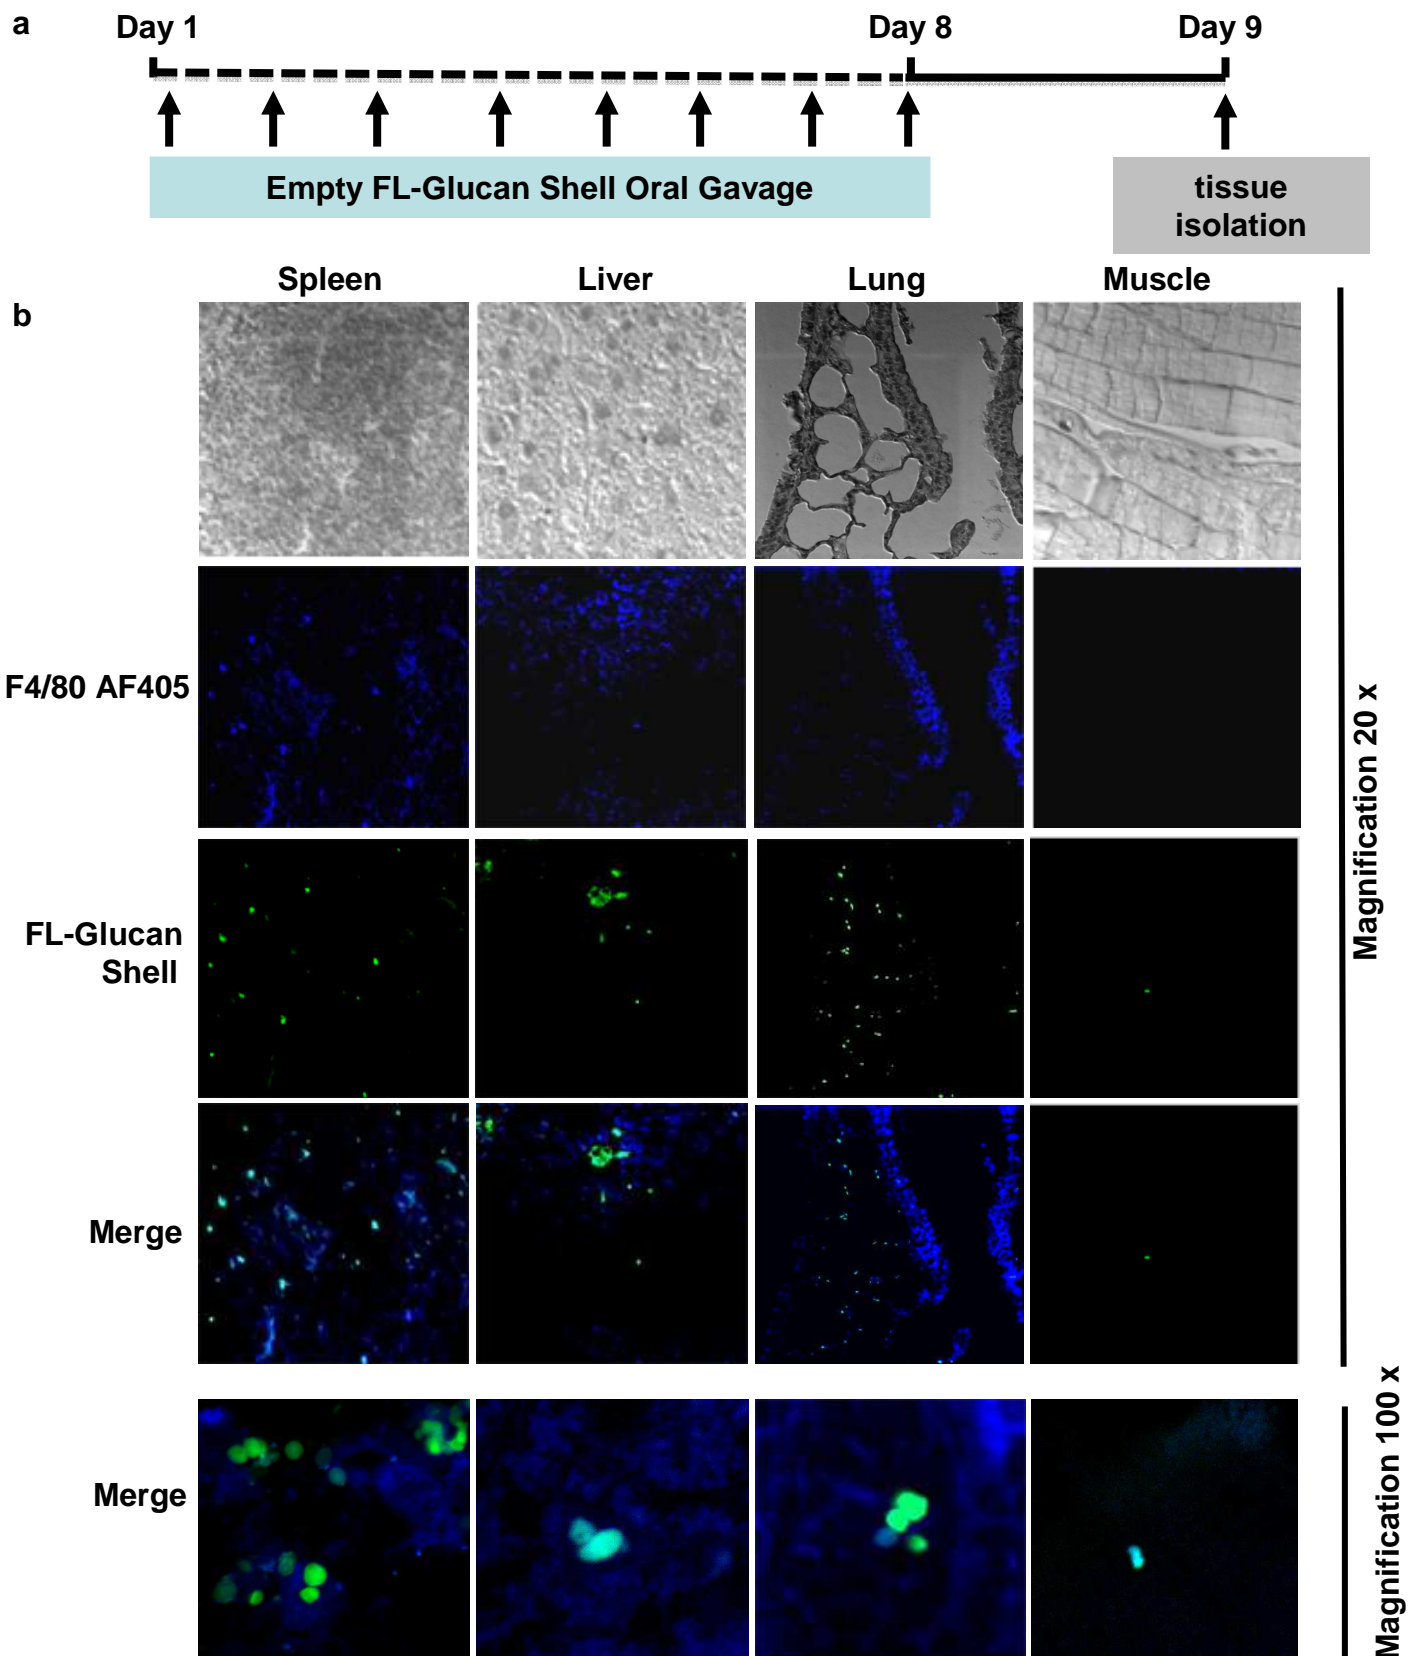

**Supplementary Figure 4. Orally administered FL-glucan shells are taken up by migratory gut macrophages and traffic into spleen, liver and lung. (a)** Timeline of oral administration of FL-glucan shells and tissue collection. Animals were on a high fat diet for 12 weeks before treatment. **(b)** Staining with F4/80-AF405 confirmed that spleen, liver and lung macrophages contained FL-glucan shells (green). Upper panels, magnification: 20x and lower panel, magnification: 100x.

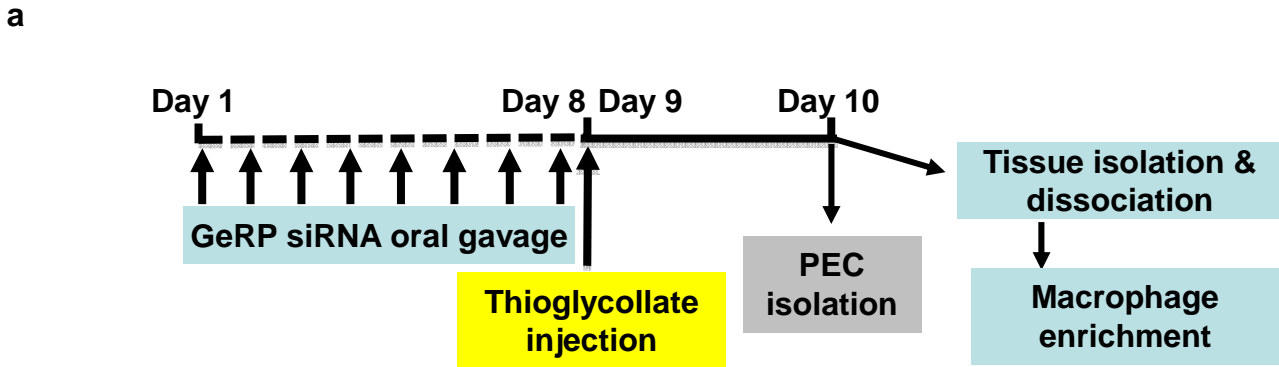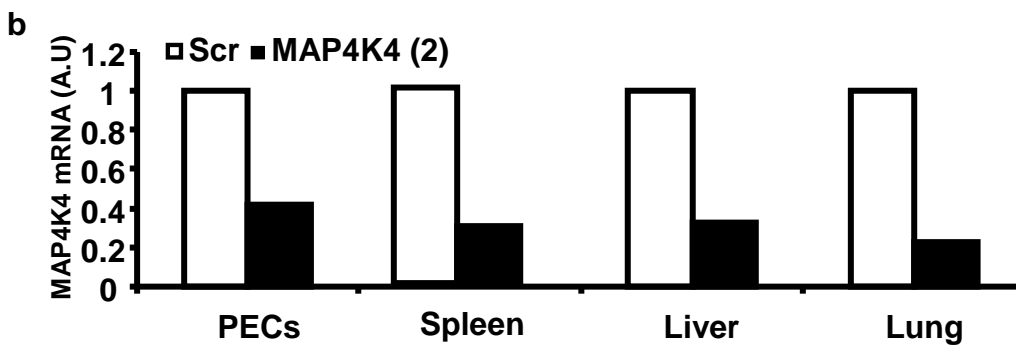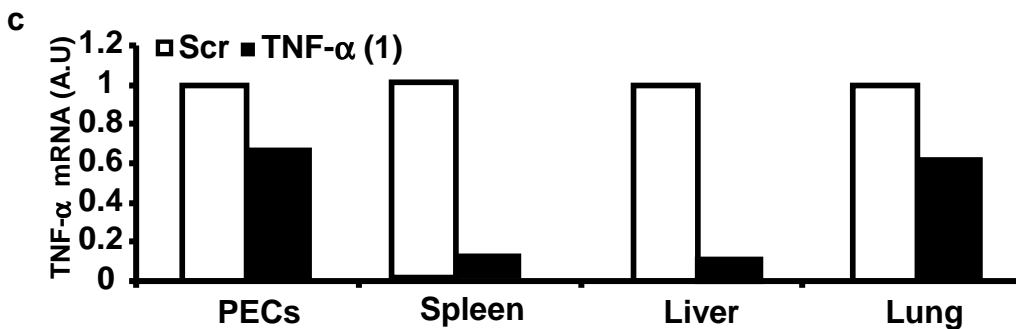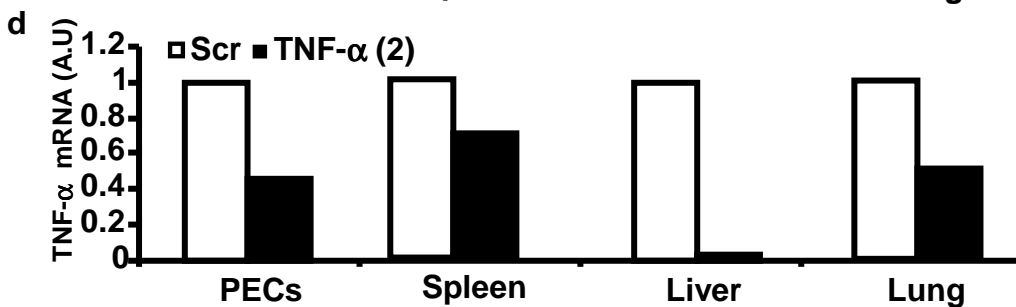

**Supplementary Figure 5. Orally administered GeRPs containing a second MAP4K4 siRNA or TNF- $\alpha$  siRNA silence MAP4K4 and/or TNF- $\alpha$  expression in PECs, and spleen, liver and lung macrophages.** Analysis of MAP4K4 or TNF- $\alpha$  expression PECs and adherent cells isolated from spleen, liver and lung from mice gavaged with GeRPs loaded with 20 ug/kg of Scr, **(a)** a second siRNA targeting MAP4K4: MAP4K4 (2), or two siRNAs against TNF- $\alpha$ , **(b)** TNF- $\alpha$  (1) or **(c)** TNF- $\alpha$  (2).

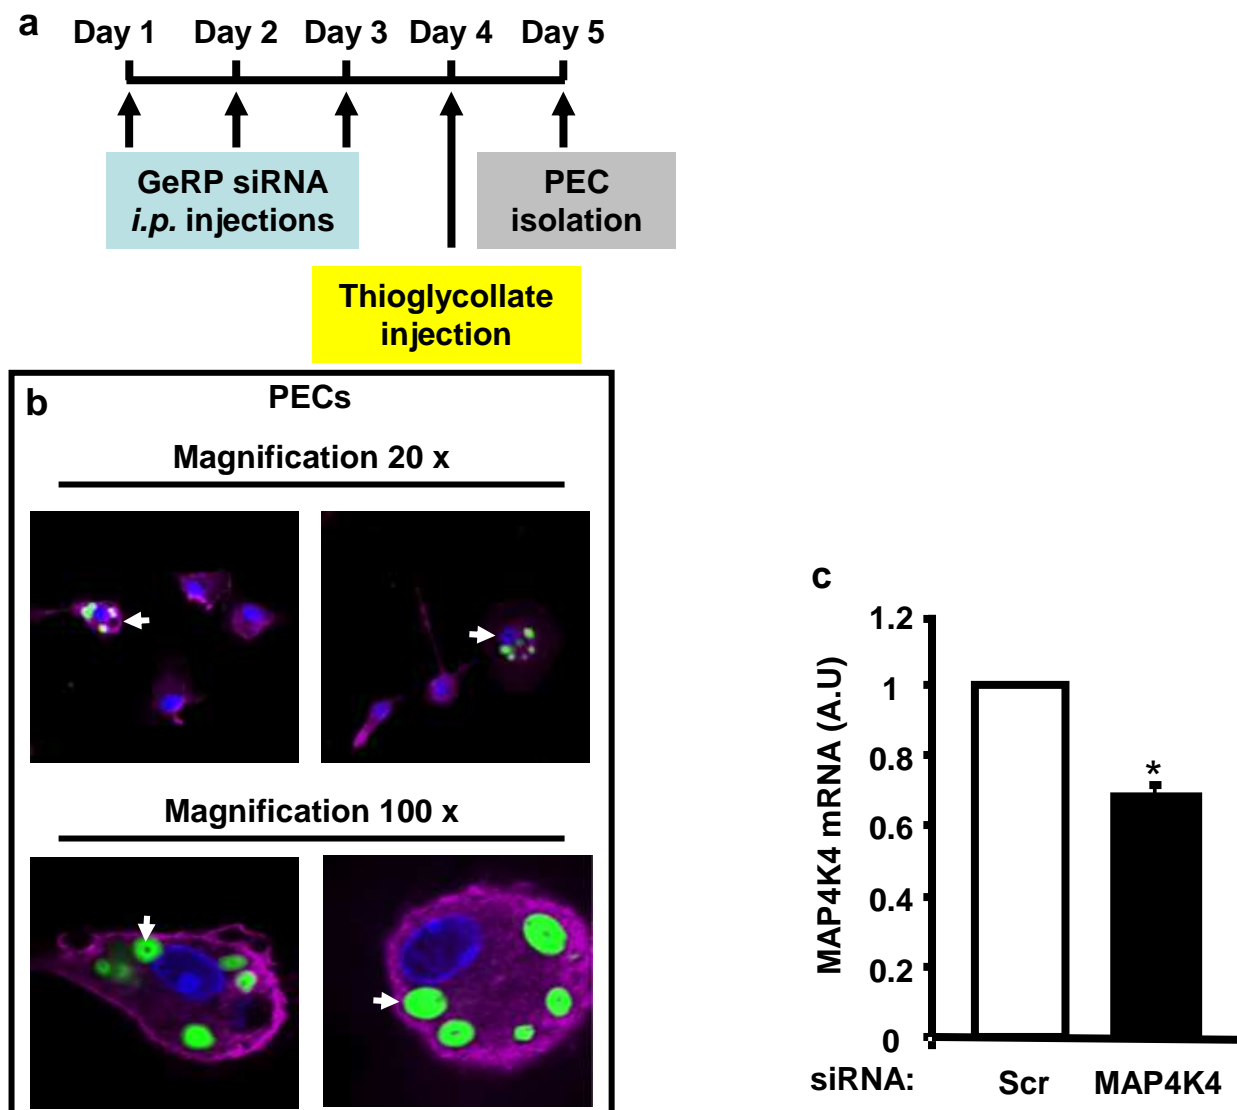

**Supplementary Figure 6. *i.p.* administration of GeRPs containing MAP4K4 siRNA reduce MAP4K4 mRNA expression in macrophages *in vivo*.** (a) Timeline of *i.p.* treatment with siRNA-GeRPs and PEC isolation. (b) Confocal microscopy of PECs. Staining with F4/80-AF633 (Magenta) confirmed that PECs contained GeRPs (green). Nuclei were stained with Dapi (blue). Arrows point to representative GeRPs. Upper panels, magnification: 20x and lower panel, magnification: 100x. (c) MAP4K4 mRNA expression. Results are expressed in arbitrary units and are the mean  $\pm$  SEM of four independent experiments. Significance was determined using Student's t-test \*  $p < 0.001$ .

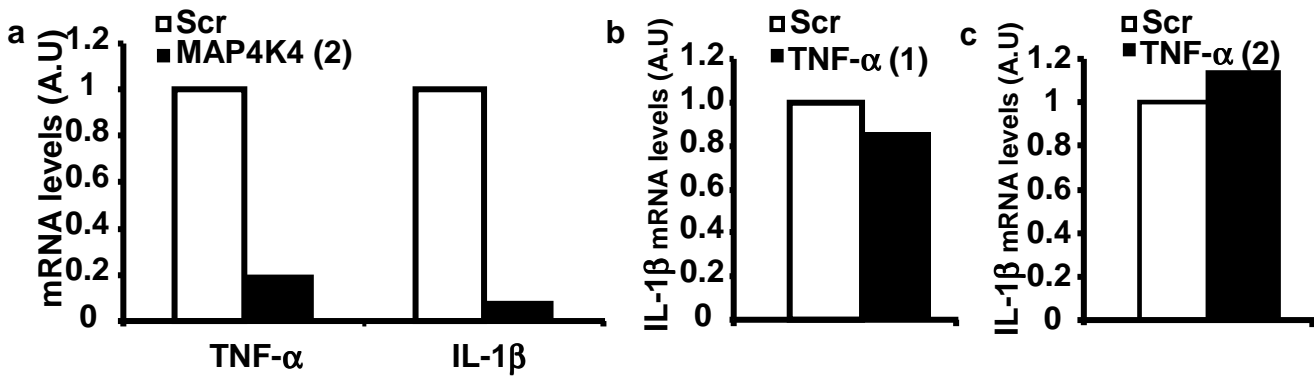

**Supplementary Figure 7. MAP4K4, but not TNF- $\alpha$  silencing inhibits IL-1 $\beta$  expression.** Expression of TNF- $\alpha$  and/or IL-1 $\beta$  in PECs isolated from mice orally treated with GeRPs containing 20 ug/kg of scr, MAP4K4 (2), TNF- $\alpha$  (1) or TNF- $\alpha$  (2) siRNA .

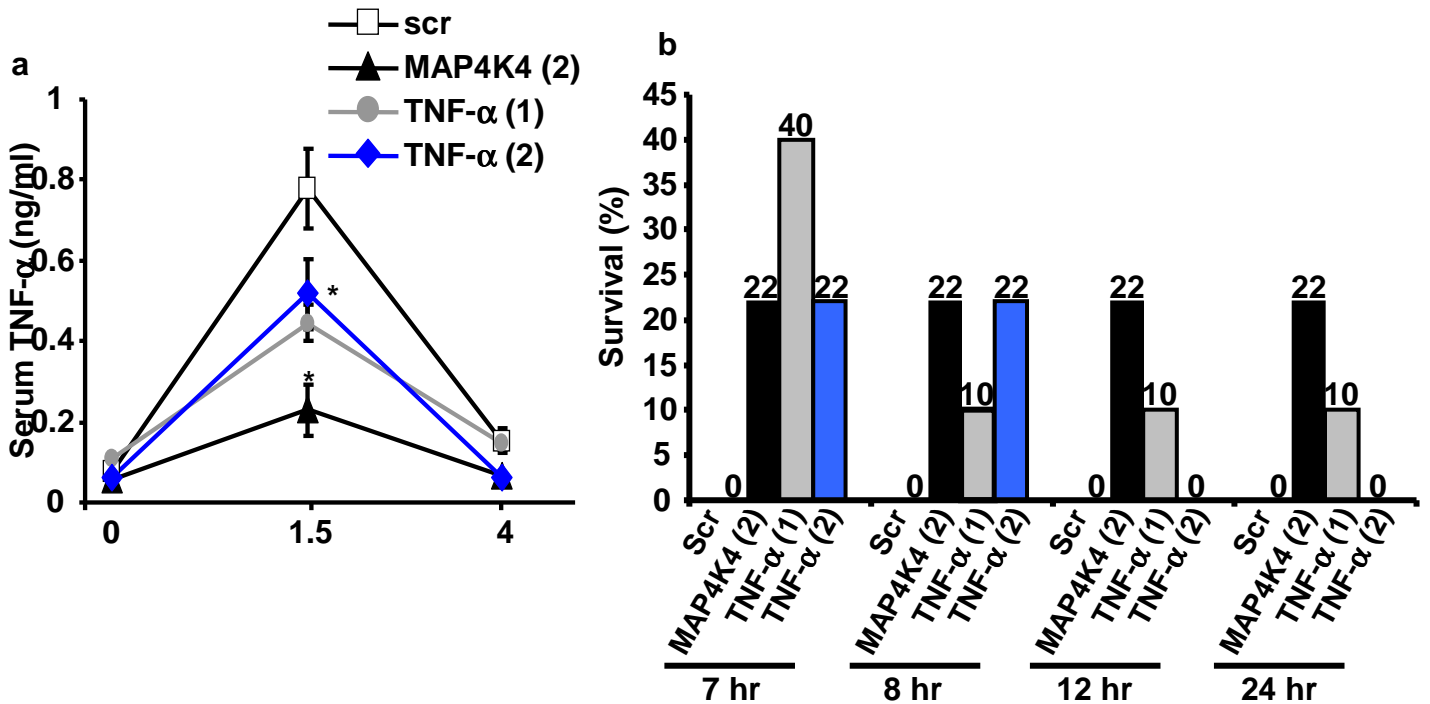

**Supplementary Figure 8. A second siRNA targeting MAP4K4 inhibits LPS-induced TNF- $\alpha$  production and lethality *in vivo*.** Mice were gavaged with siRNA-GeRPs. Four hours after the final gavage, mice were *i.p.* injected with D-GalN, followed by an *i.p.* injection of LPS. **(a)** Serum TNF- $\alpha$  levels in siRNA treated mice 1.5 and 4 hours after LPS/D-GalN injection. Results are the mean  $\pm$  SEM (n=5). Statistical significance was determined by ANOVA and Tukey post test; \* $p$  < 0.05. **(b)** Percent survival of mice orally treated with siRNA-GeRPs followed by LPS/D-GalN injections.

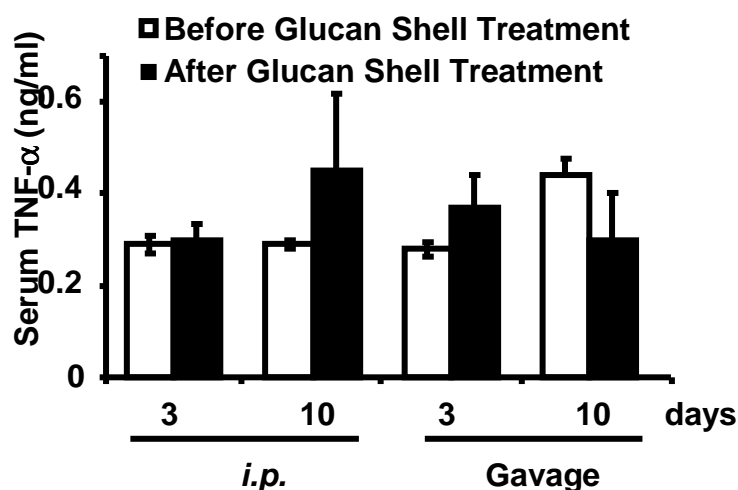

**Supplementary Figure 9. Administration of glucan shells by *i.p.* injection or oral gavage fails to change TNF-alpha levels in serum.** Serum TNF- $\alpha$  levels in the absence of LPS before and after the administration of empty glucan shells by *i.p.* injection or by oral gavage.

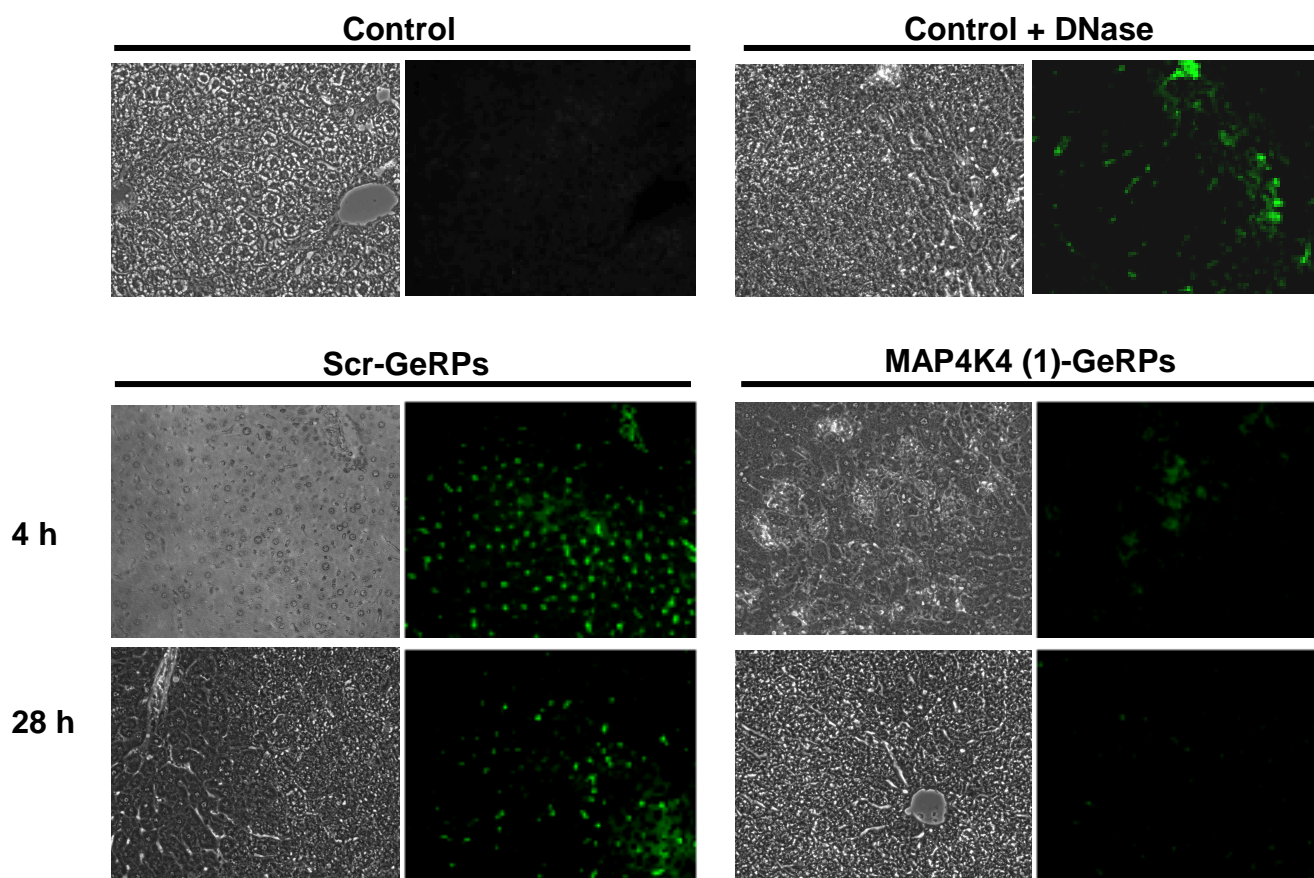

**Supplementary Figure 10. TUNEL assay shows MAP4K4 containing GeRPs protects against LPS/D-GalN liver toxicity.** Silencing MAP4K4 inhibits LPS/D-GalN -induced apoptosis in liver 4 and 28 hours after LPS/D-GalN injection. Livers from untreated mice were treated with or without DNase and used as positive and negative controls, respectively.

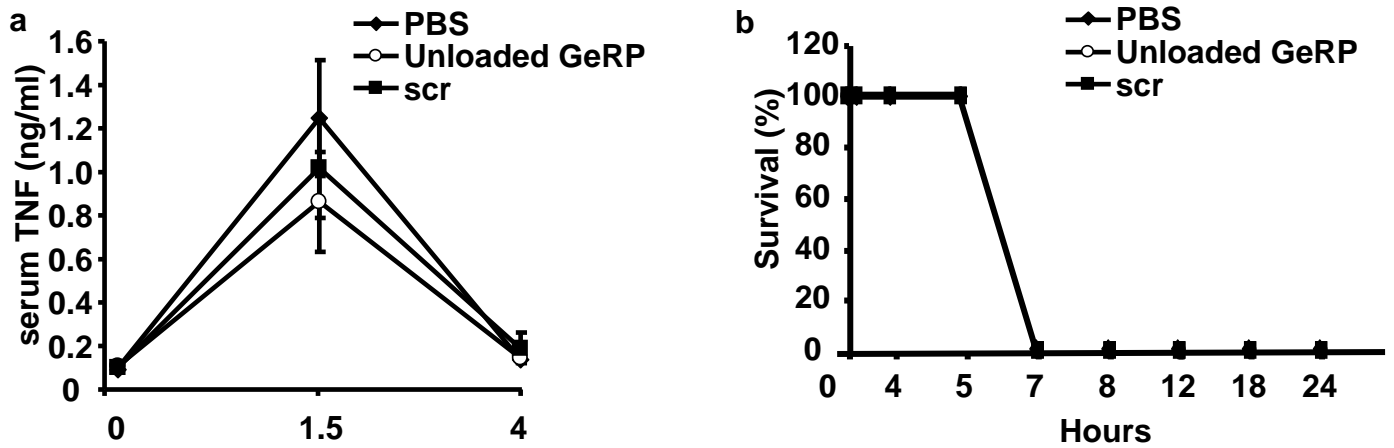

**Supplementary Figure 11. Unloaded GeRPs or GeRPs loaded with scramble siRNA have no effect on LPS-induced TNF- $\alpha$  production and lethality *in vivo*.** Mice were gavaged with unloaded GeRPs or GeRPs loaded with 20  $\mu$ g/kg of Scr siRNA. Four hours after the final gavage, mice were *i.p.* injected with D-GalN, followed by an *i.p.* injection of LPS. **(a)** Serum TNF- $\alpha$  levels were measured 1.5 and 4 hours after LPS/D-GalN injection. Results are the mean  $\pm$  SEM (n=5). Statistical significance was determined by ANOVA and Tukey post test. **(b)** Percent survival of mice orally treated with siRNA-GeRPs, and then injected with LPS/D-GalN. Survival was assessed every hour for 24 hours.

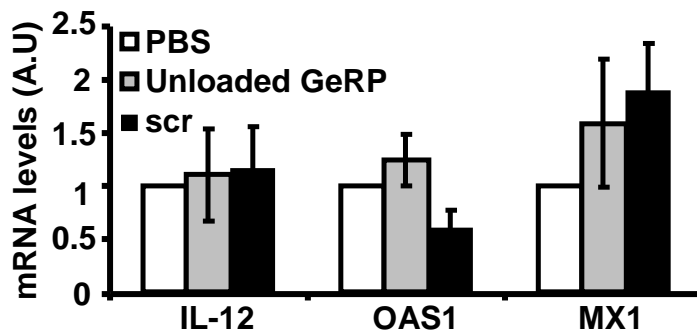

**Supplementary Figure 12. siRNA-GeRPs failed to elicit an interferon response *in vitro*.**  $10^6$  PECs were treated with PBS,  $10^7$  unloaded GeRPs or GeRPs loaded with Scr siRNA. Total RNA was harvested 48 hours after treatment and analyzed by real time PCR for the expression of INF $\beta$  target genes, OAS1 and MX1 or INF $\gamma$  target genes, IL-12. Results are the mean  $\pm$  SEM (n=3).

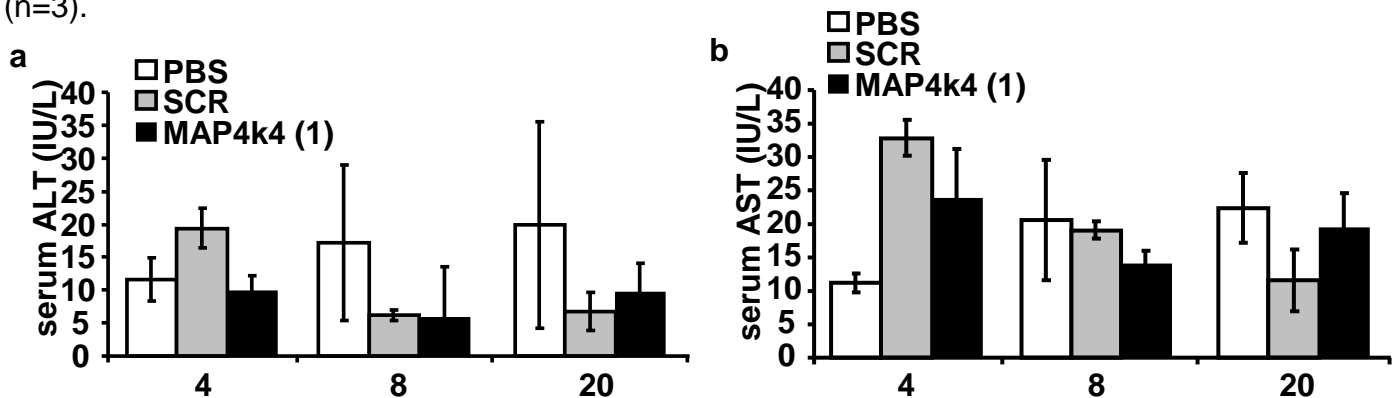

**Supplementary Figure 13. siRNA-GeRP oral treatment fails to alter serum liver enzyme levels *in vivo*.** Mice were gavaged with PBS or GeRPs containing 20  $\mu$ g/kg of Scr or MAP4K4 (1) siRNA. **(a)** Alanine aminotransferase (ALT) and **(b)** aspartate aminotransferase (AST) were measured in serum 4, 8 and 20 days after the last gavage (n=3).



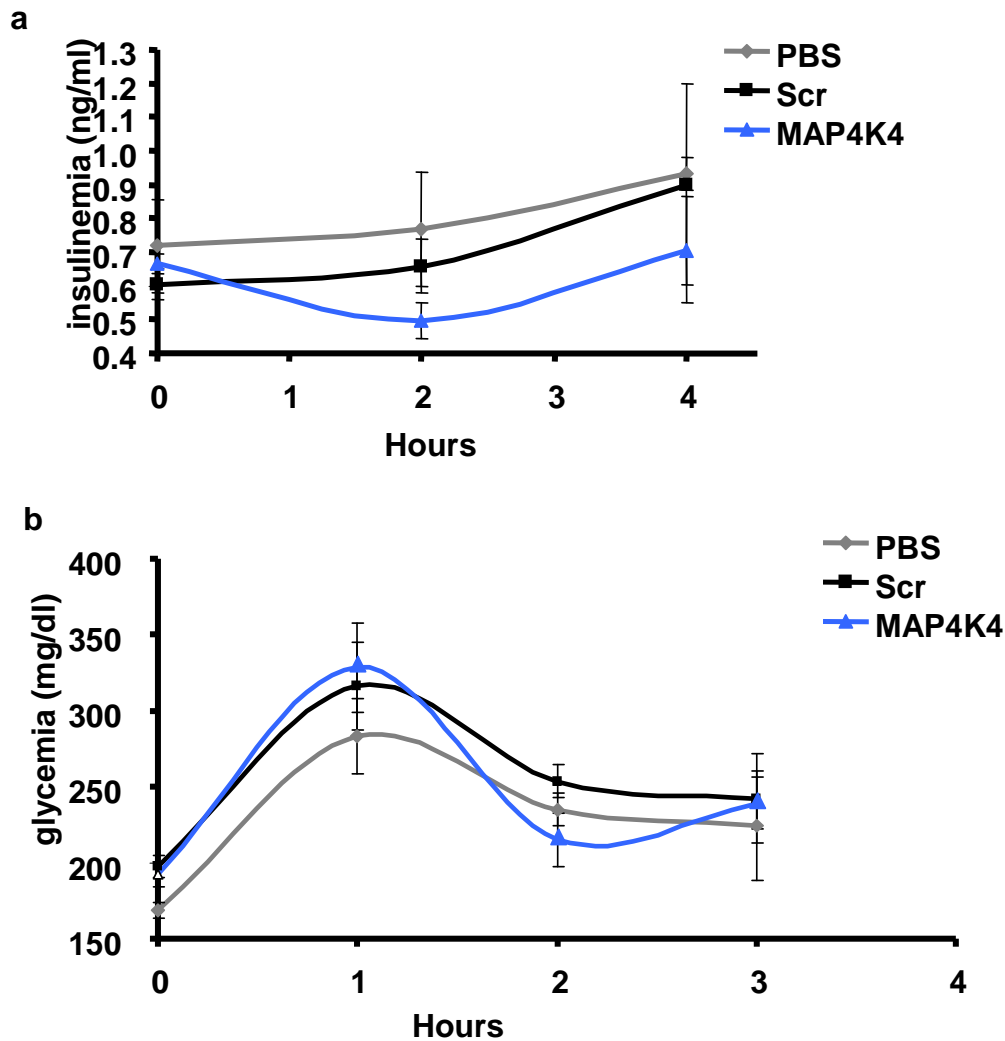

**Supplementary Figure 14. MAP4K4 silencing fails to affect LPS regulation of blood glucose and insulin levels.** Mice were gavaged with PBS or GeRPs loaded with 20 ug/kg of Scr or MAP4K4 (1) siRNA. Four hours after the final gavage, mice were *i.p.* injected with D-GalN, followed by an *i.p.* injection of LPS. **(a)** Serum insulin levels 2 and 4 hours after LPS/D-GalN injection. **(b)** Serum glucose levels 1, 2 and 3 hours after LPS/D-GalN injection. Results are the mean  $\pm$  SEM (n=5). Statistical significance was determined by ANOVA and Tukey post test.

|                   | Accession numbers | siRNA sequence            | Percentage <i>in vitro</i> knockdown | Percentage <i>in vivo</i> knockdown |
|-------------------|-------------------|---------------------------|--------------------------------------|-------------------------------------|
| Scramble          | –                 | 5'-CAGUCGCGUUUGCGACUGG-3' | 0                                    | 0                                   |
| Map4K4 (1)        | NM_008696         | 5'-GACCAACUCUGGCUUGUUA-3' | 72                                   | 70                                  |
| Map4K4 (2)        |                   | 5'-CAGAAGUGGCCAAGGGAAA-3' | 60                                   | 60                                  |
| TNF- $\alpha$ (1) | NM_013693         | 5'-GACAACCAACUAGUGGUGC-3' | 40                                   | 33                                  |
| TNF- $\alpha$ (2) |                   | 5'-GCAUGGAUCUCAAGACAA-3'  | 31                                   | 54                                  |

**Supplementary Table 1.** *in vitro* and *in vivo* knockdown with various siRNA-GeRPs

| Hours after LPS/D-Galactosamine Injection | Number of Mice Surviving at Indicated Time Point |       |        |
|-------------------------------------------|--------------------------------------------------|-------|--------|
|                                           | PBS                                              | Scr   | MAP4K4 |
| 0                                         | 11/11                                            | 22/22 | 22/22  |
| 6                                         | 4/11                                             | 14/22 | 18/22  |
| 7                                         | 1/11                                             | 3/22  | 15/22  |
| 8                                         | 1/11                                             | 2/22  | 11/22  |
| 10                                        | 1/11                                             | 2/22  | 9/22   |
| 24                                        | 1/11                                             | 2/22  | 8/22   |

**Supplementary Table 2.** Survival post LPS-challenge of mice treated with PBS, Scr or MAP4K4 (1) siRNA-GeRPs.

|             | Chi-Square | Df | Sig.  |
|-------------|------------|----|-------|
| Log Rank    | 8.334      | 1  | 0.004 |
| Breslow     | 8.799      | 1  | 0.003 |
| Tarone-Ware | 8.99       | 1  | 0.003 |

**Supplementary Table 3.** Statistical testing of the equality of survival probabilities between Scr and MAP4K4 (1) siRNA-GeRP treatments in the LPS/D-galactosamine challenge.

| <b>Primer</b> | <b>Sequence</b>           |
|---------------|---------------------------|
| 36B4 F        | TCCAGGCTTTGGGCATCA3       |
| 36B4 R        | CTTTATCAGCTGCACATCACTCAGA |
| MAP4K4 F      | CATCTCCAGGGAAATCCTCAGG    |
| MAP4K4 R      | TTCTGTAGTCGTAAGTGGCGTCTG  |
| TNF-a F       | CCCTCACACTCAGATCATCTTCT   |
| TNF- a R      | GCTACGACGTGGGCTACAG       |
| IL-1b F       | GCAACTGTTCCCTGAACTCAACT   |
| IL-1 b R      | ATCTTTTGGGGTCCGTCAACT     |
| IL-10 F       | CTGGACAACATACTGCTAACCG    |
| IL-10 R       | GGGCATCACTTCTACCAGGTAA    |
| CCR2-F        | ATCCACGGCATACTATCAAGATC   |
| CCR2-R        | CAAGGGTCACCATCATGGTAG     |
| OAS1-F        | ATTACCTCCTTCCCGACACC      |
| OAS1-R        | CAAACCTCCACCTCCTGATGC     |
| MX1-F         | GATCCGACTTCACTTCCAGATGG   |
| MX1-R         | CATCTCAGTGGTAGTCAACCC     |
| IL-12p40      | AGACATGGAGTCATAGGCTCTG    |
| IL-12p40      | CCATTTTCCTTCTTGTGGAGCA    |

**Supplementary Table 4** Primer sequences
